# Supplementary material for: Healthcare Utilization and Direct Costs in Patients with Ankylosing Spondylitis Using a Large US Administrative Claims Database
Source: PubMed Central journal article supplement — Rheumatol Ther. 2018 Aug 18;5(2):463–74. doi: 10.1007/s40744-018-0124-4 (PMC6251838; doi:10.1007/s40744-018-0124-4), 2018-08-18
Supplement: 40744_2018_124_MOESM1_ESM.pdf [file 40744_2018_124_MOESM1_ESM.pdf]

## SUPPLEMENTAL DATA

**Table S1.** Baseline clinical characteristics and comorbidities of patients with AS and their matched controls

| <b>Comorbidities</b>           | <b>Patients with AS<br/>N = 6679</b> | <b>Matched controls<br/>N = 19,951</b> | <b>P value</b> |
|--------------------------------|--------------------------------------|----------------------------------------|----------------|
| Comorbidities, n (%)           |                                      |                                        |                |
| Asthma                         | 145 (2.2)                            | 218 (1.1)                              | < 0.001        |
| Cardiovascular disease         | 2295 (34.4)                          | 5849 (29.3)                            | < 0.001        |
| Angina                         | 79 (1.2)                             | 146 (0.7)                              | < 0.001        |
| Atherosclerosis                | 482 (7.2)                            | 1,139 (5.7)                            | < 0.001        |
| Cerebrovascular disease/stroke | 110 (1.6)                            | 260 (1.3)                              | 0.038          |
| Coronary artery disease        | 322 (4.8)                            | 743 (3.7)                              | < 0.001        |
| Hypertension                   | 2053 (30.7)                          | 5267 (26.4)                            | < 0.001        |
| Myocardial infarction          | 84 (1.3)                             | 178 (0.9)                              | 0.009          |
| Peripheral vascular disease    | 110 (1.6)                            | 311 (1.6)                              | 0.617          |
| Venous thromboembolism         | 77 (1.2)                             | 167 (0.8)                              | 0.019          |
| Depression                     | 712 (10.7)                           | 1152 (5.8)                             | < 0.001        |
| Diabetes                       | 656 (9.8)                            | 2113 (10.6)                            | 0.075          |
| Dyslipidemia                   | 1564 (23.4)                          | 4439 (22.3)                            | 0.048          |
| Gastrointestinal ulcers        | 75 (1.1)                             | 79 (0.4)                               | < 0.001        |
| Malignancies                   | 450 (6.7)                            | 1,094 (5.5)                            | < 0.001        |
| Multiple sclerosis             | 31 (0.5)                             | 51 (0.3)                               | 0.008          |
| Osteoporosis                   | 259 (3.9)                            | 191 (1.0)                              | < 0.001        |
| Parkinson disease              | 17 (0.3)                             | 43 (0.2)                               | 0.561          |
| Sleep apnea                    | 585 (8.8)                            | 1008 (5.1)                             | < 0.001        |

|                                      |           |           |         |
|--------------------------------------|-----------|-----------|---------|
| Spinal fracture                      | 59 (0.9)  | 39 (0.2)  | < 0.001 |
| Conditions associated with AS, n (%) |           |           |         |
| Inflammatory bowel disease           | 439 (6.6) | 128 (0.6) | < 0.001 |
| Crohn disease                        | 281 (4.2) | 57 (0.3)  | < 0.001 |
| Ulcerative colitis                   | 192 (2.9) | 81 (0.4)  | < 0.001 |
| Psoriasis                            | 138 (2.1) | 171 (0.9) | < 0.001 |
| Uveitis                              | 654 (9.8) | 45 (0.2)  | < 0.001 |

AS ankylosing spondylitis, *ICD-9-CM* International Classification of Diseases, Ninth

Revision, Clinical Modification
